# Supplementary material for: Polydopamine/ZnO electron transport layers enhance charge extraction in inverted non-fullerene organic solar cells
Source: Royal Society of Chemistry journal article supplement (doi:10.1039/c9tc02781e), 2019-01-01
Supplement: c9tc02781e1.pdf [file c9tc02781e1.pdf]

## Polydopamine/ZnO electron transport layers enhance charge extraction in inverted non-fullerene organic solar cells

Nafees Ahmad,<sup>ad</sup> Xuning Zhang,<sup>ab</sup> Yang Shuo,<sup>ad</sup> Dongyang Zhang,<sup>ab</sup> Wang Jianqiu,<sup>a</sup> Saud uz Zafar,<sup>ad</sup> Li Yanxun,<sup>ad</sup> Yuan Zhang,<sup>b</sup> Sabir Hussain,<sup>ad</sup> Zhihai Cheng,<sup>c</sup> Anbu Kumaresan,<sup>ad</sup> Huiqiong Zhou,<sup>a,\*</sup>

<sup>a</sup>CAS Key Laboratory of Nanosystem and Hierarchical Fabrication, CAS Center for Excellence in Nanoscience, National Center for Nanoscience and Technology, Beijing 100190, P. R. China.

\*Email: [zhouhq@nanoctr.cn](mailto:zhouhq@nanoctr.cn)

<sup>b</sup>School of Chemistry, Beijing Advanced Innovation Center for Biomedical Engineering, Beihang University, Beijing 100191, P. R. China

<sup>c</sup>Beijing Key Laboratory of Optoelectronic Functional Materials and Micro-nano Devices, Department of Physics, Renmin University of China, Beijing 100872, P. R. China

<sup>d</sup>University of Chinese Academy of Sciences, Beijing 100049, P.R.China.

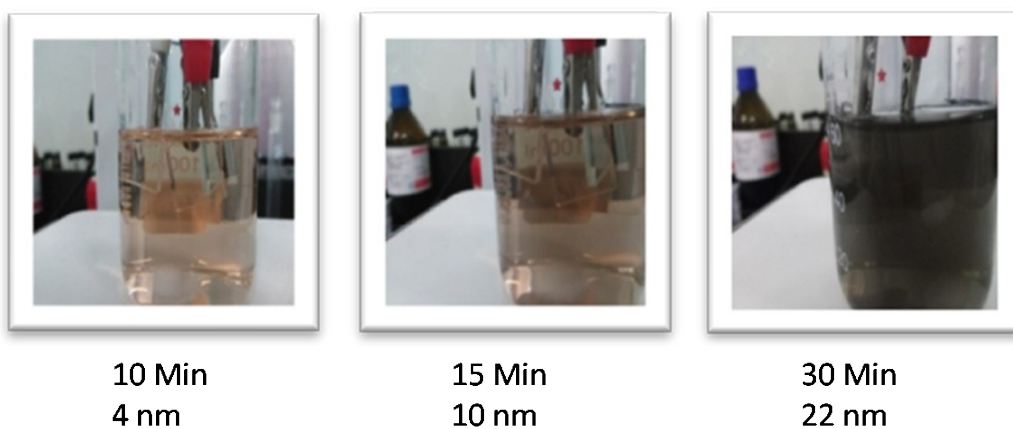

Fig. S1 Photographic images of PDA solution with a different time interval

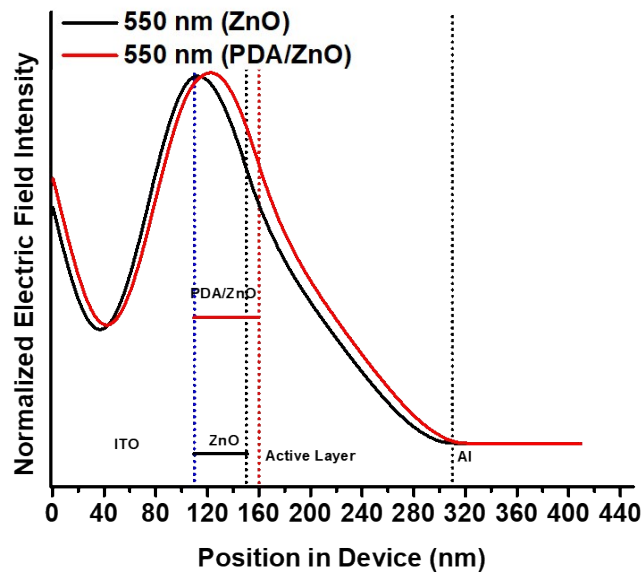

Fig. S2 Optical field distribution in solar cell devices based on ZnO or PDA/ZnO ETLs.

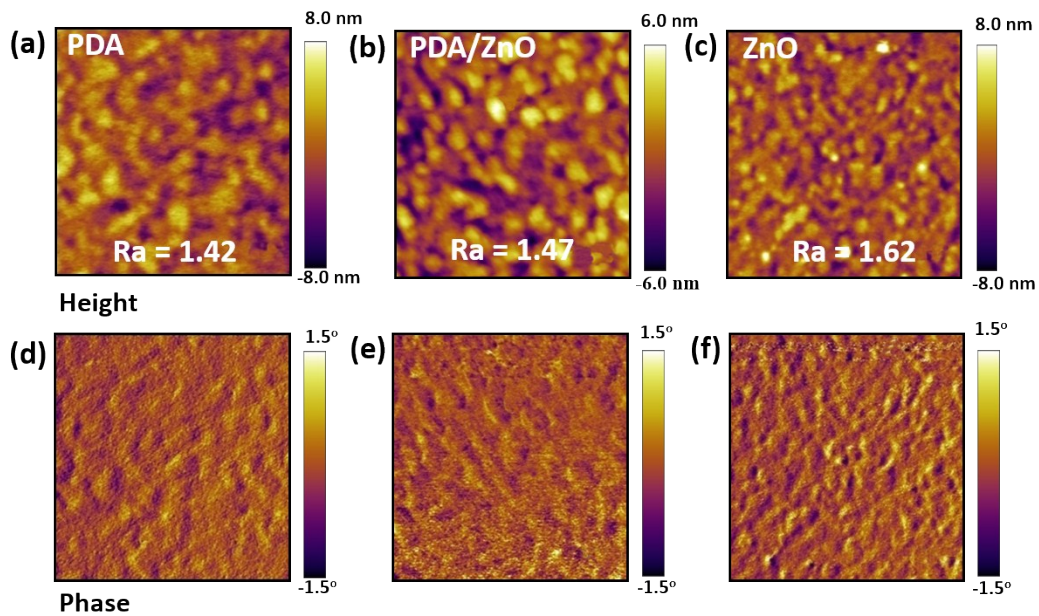

Fig. S3 AFM height and phase Images based on PDA (a, d) PDA/ZnO(b, e) and ZnO (c, f)

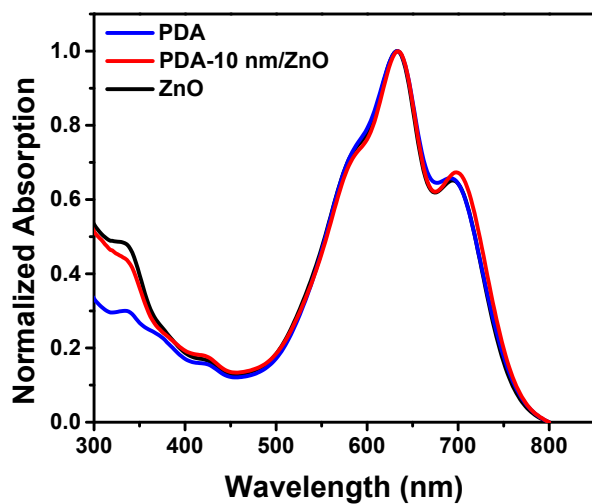

Fig. S4 Normalized absorption spectra of BHJ coated on PDA, PDA/ZnO and ZnO thin films ETLs.

Table. S1 Conductivity results based on PDA, PDA-10/ZnO and ZnO ETLs.

| Applied Voltage | ZnO (nA) | PDA-10/ZnO (pA) |
|-----------------|----------|-----------------|
| -4              | -6.45    | -920.203        |
| -3              | -4.295   | -11.428         |
| -2              | -3.826   | 363.412         |
| -1              | 5.447    | 403.292         |
| 0               | 8.026    | -0.10546        |
| +1              | 8.91     | 5.428           |
| +2              | 21.334   | 422.43          |
| +3              | 23.891   | 493.489         |
| +4              | 51.307   | 683.39          |

**Table. S2 Photovoltaic parameter of devices (PBDBT:ITIC) based on PDA, PDA/ZnO, and ZnO ETLs.**

| ETL           | Voc (V)          | Jsc /mA.cm <sup>-2</sup> | FF /%             | PCE / %           |
|---------------|------------------|--------------------------|-------------------|-------------------|
| PDA           | 0.34(0.34±0.02)  | 13.65(12.06±1.99)        | 48.43(43.53±3.41) | 2.24(2.10±0.11)   |
| PDA-4 nm/ZnO  | 0.87(0.87±0.001) | 16.98(16.94±0.40)        | 66.38(66.23±1.33) | 9.92(9.82±0.08)   |
| PDA-10nm/ZnO  | 0.88(0.88±0.01)  | 17.86(17.76±0.32)        | 70.91(69.89±0.54) | 11.14(10.98±0.10) |
| PDA-22 nm/ZnO | 0.87(0.87±0.01)  | 17.28(17.14±0.28)        | 67.18(67.05±0.73) | 10.21(10.11±0.06) |
| ZnO 30 nm     | 0.87(0.87±0.01)  | 16.77(16.75±0.22)        | 67.82(67.42±0.68) | 10.15(10.04±0.15) |

The average values and standard deviations (listed in bracket) were calculated based on data extracted from 12 devices

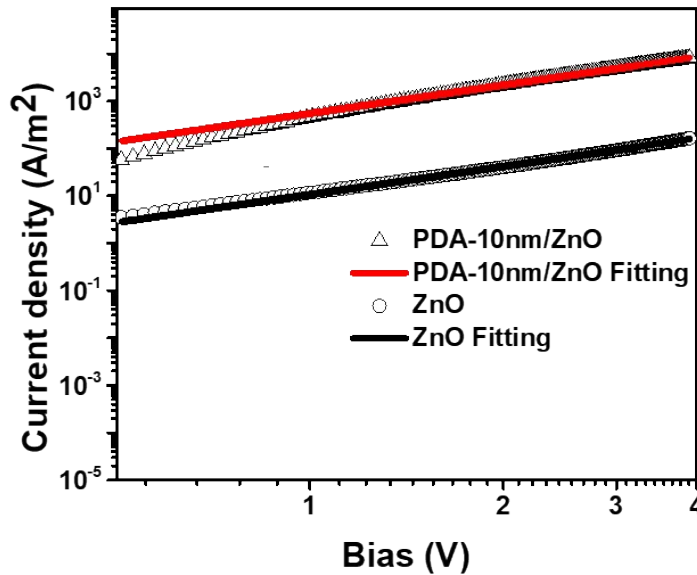

**Fig. S5 J-V characteristics of electron only device in configuration of ITO/ETL (PDA/ZnO)/BHJ/Al, solid lines represent best fit using SCLC model.**

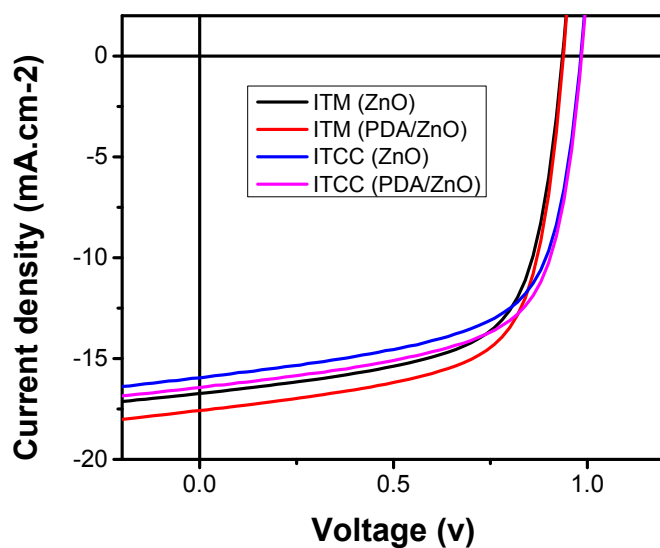

Fig. S6 Current density versus voltage (J-V) characteristics PBDBT-ITIM and PBDBT-ITCC solar cells with PDA/ZnO ETLs under AM 1.5 G solar irradiation ( $100 \text{ mW/cm}^2$ ).

Table. S3 Photovoltaic parameter of devices based on PDA/ZnO, and ZnO ETLs with ITM and ITCC Acceptor with same Donor PBDB-T

| ETL           | BHJ        | Voc (V) | Jsc / $\text{mA.cm}^{-2}$ | FF /% | PCE / % |
|---------------|------------|---------|---------------------------|-------|---------|
| ZnO           | PBDBT:ITM  | 0.92    | 16.72                     | 66.49 | 10.2    |
| PDA-10 nm/ZnO |            | 0.92    | 17.57                     | 67.19 | 10.9    |
| ZnO           | PBDBT:ITCC | 0.98    | 15.95                     | 63.97 | 10.0    |
| PDA-10 nm/ZnO |            | 0.98    | 16.53                     | 65.16 | 10.5    |
